# Supplementary material for: Graphene oxide-Au nano particle coated quartz crystal microbalance biosensor for the real time analysis of carcinoembryonic antigen
Source: PubMed Central journal article supplement — RSC Adv. 2020 Jan 24;10(7):4118–28. doi: 10.1039/c9ra09963h (PMC9049092; doi:10.1039/c9ra09963h), 2020-01-24
Supplement: RA-010-C9RA09963H-s001.pdf [file RA-010-C9RA09963H-s001.pdf]

## Graphene oxide-Au nano particle coated quartz crystal microbalance biosensor for the real time analysis of carcinoembryonic antigen

P J Jandas<sup>1</sup>, Jingting Luo<sup>1,2\*</sup>, Aojie Quan<sup>1</sup>, Chong Li<sup>1</sup>, Chen Fu<sup>1\*</sup>, Y Q Fu<sup>3</sup>

<sup>1</sup> Key Laboratory of Optoelectronic Devices and Systems of Ministry of Education and Guangdong Province, College of Physics and Optoelectronic Engineering, Shenzhen University, 518060, Shenzhen, PR China

<sup>2</sup> State Key Laboratory of Powder Metallurgy, Central South University, Changsha, PR China

<sup>3</sup> Faculty of Engineering and Environment, Northumbria University, Newcastle upon Tyne, NE1 8ST, UK

### Supportive Data

**Table S1:** Comparative results of actual and experimental estimation of mass deposition of CEA in each immunoassay run.

| The concentration of CEA stock solution (ng/ml) | Experimental value without O <sub>2</sub> plasma (ng) | Experimental value with O <sub>2</sub> plasma (ng) | Theoretically calculated Value in (ng) |
|-------------------------------------------------|-------------------------------------------------------|----------------------------------------------------|----------------------------------------|
| 0.1                                             | 0.12±0.4                                              | 0.13±0.4                                           | 0.15                                   |
| 1                                               | 1.11±0.4                                              | 1.23±0.4                                           | 1.5                                    |
| 10                                              | 14.23±2.35                                            | 14.45±2.16                                         | 15                                     |
| 20                                              | 28.54±3.65                                            | 28.95±3.85                                         | 30                                     |
| 40                                              | 57.48±4.5                                             | 57.68±4.1                                          | 60                                     |
| 60                                              | 85.89±6.58                                            | 86.46±5.76                                         | 90                                     |

|     |              |              |     |
|-----|--------------|--------------|-----|
| 80  | 115.65±8.85  | 115.55±8.22  | 120 |
| 100 | 144.76±10.75 | 145.76±8.78  | 150 |
| 120 | 172.68±12.89 | 174.76±10.64 | 180 |

**Table S2:** Sensitivity reported by various piezoelectric studies for CEA detection

| Study            | Sensitivity | Method                  |
|------------------|-------------|-------------------------|
| S. Li et al [25] | 37 pg/ml    | Love wave               |
| Chen et al [14]  | 5 ng/ml     | QCM                     |
| Zheng et al [27] | 0.2 mg/mL   | Bulk Acoustic resonator |
| Zhang [28]       | 1 ng/ml     | SAW                     |
| Present Work     | 0.33 ng/ml  | QCM                     |

**Table S3:** Combination of various tumor marking proteins

| Alpha-1-fetoprotein (AFP) (ng/ml) | Cancer antigen 125 (CA125) (ng/ml) | L-tryptophan (ng/ml) | Carcinoembryonic antigen (CEA) (ng/ml) |
|-----------------------------------|------------------------------------|----------------------|----------------------------------------|
| 0                                 | 1                                  | 0                    | 1                                      |
| 1                                 | 0                                  | 0                    | 1                                      |
| 0                                 | 0                                  | 1                    | 1                                      |
| 0                                 | 0                                  | 0                    | 1                                      |

**Table S4:** Steady-state fractional coverage of gold surface for each concentration of anti-CEA

| <b>anti-CEA concentration<br/>(<math>\mu\text{g/mL}</math>)</b> | <b>E2</b>       | <b>E1</b>       |
|-----------------------------------------------------------------|-----------------|-----------------|
| 50                                                              | $0.86 \pm 0.06$ | $0.71 \pm 0.04$ |
| 75                                                              | $0.88 \pm 0.06$ | $0.73 \pm 0.05$ |
| 100                                                             | $0.89 \pm 0.04$ | $0.75 \pm 0.08$ |
| 125                                                             | $0.89 \pm 0.07$ | $0.75 \pm 0.09$ |

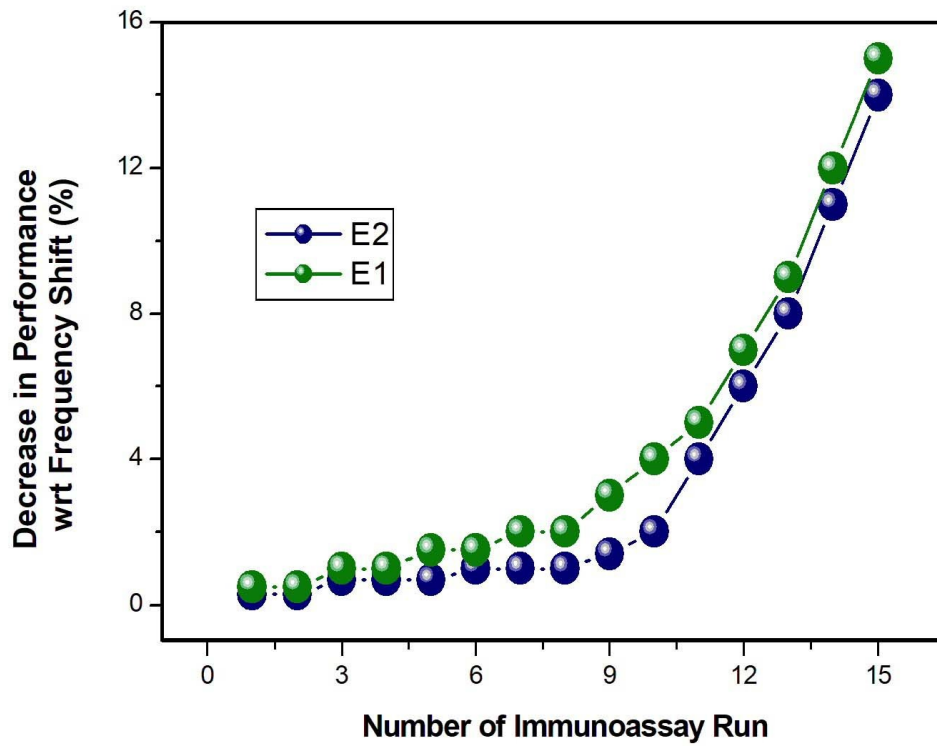

**Figure S1:** Reproducibility in results of biosensors E1 and E2
